# 1 **Cerebellar contribution to preparatory activity in motor neocortex**

2

3 **Francois Chabrol, Antonin Blot and Thomas D. Mrsic-Flogel**

4 Biozentrum, University of Basel, Klingelbergstrasse 70, 4056 Basel, Switzerland.

5 Sainsbury Wellcome Center, University College London, 25 Howland Street London, W1T 4JG, UK.

6 Correspondence: [t.mrsic-flogel@ucl.ac.uk](mailto:t.mrsic-flogel@ucl.ac.uk); [f.chabrol@ucl.ac.uk](mailto:f.chabrol@ucl.ac.uk)

7

8 **In motor-related areas of the neocortex, preparatory neuronal activity predictive of specific actions**  
9 **emerges seconds in advance of movement and is maintained by a positive feedback loop with the**  
10 **thalamus. A major source of excitatory drive to the motor thalamus is the cerebellum, which has been**  
11 **implicated in coordination and timing of learned actions. However, the cerebellar contribution to**  
12 **neocortical signals coupled to movement planning remains poorly understood. Here we show that**  
13 **cerebellar output neurons in the dentate nucleus exhibit preparatory ramping activity in anticipation**  
14 **of expected rewards in a virtual reality conditioning task, a profile similar to that recorded in**  
15 **anterolateral motor neocortex (ALM). The preparatory activity in the dentate nucleus is controlled by**  
16 **a disinhibitory circuit involving inhibitory Purkinje cells in the cerebellar cortex, many of which**  
17 **suppress their firing in advance of rewards. Silencing the activity in the dentate nucleus by**  
18 **photoactivation of Purkinje cells caused robust, short-latency suppression in the majority of ALM**  
19 **neurons exhibiting preparatory activity. Thus, preparatory signals in motor neocortex require the**  
20 **output of the cerebellum. We suggest that the reciprocal circuitry between neocortex and cerebellum**  
21 **generates the sequence of activity required for planning and temporal coordination of learned, goal-**  
22 **directed actions.**

23

24 The cerebellum is a key brain structure for the learning of sensorimotor and internal context relevant for  
25 movement timing<sup>1</sup>. The cerebellar hemispheres are interconnected with the neocortex via the  
26 disynaptic cortico-ponto-cerebellar and cerebello-thalamo-cortical pathways<sup>2-6</sup>. The sole output of the  
27 cerebellum are the deep cerebellar nuclei, where ~40 inhibitory Purkinje cells converge on individual  
28 postsynaptic cells<sup>7</sup>. The dentate nucleus (DN), the most lateral output nucleus of the cerebellum, sends  
29 excitatory projections to the motor thalamic regions linked to cortical areas involved in the preparation  
30 and execution of voluntary movements<sup>8-12</sup>. Although the cerebellum is mostly known for its role in  
31 adjusting the timing and degree of muscle activation, neurons at different stages of cerebellar hierarchy  
32 can also encode signals related to upcoming movements or salient events such as reward<sup>13-16</sup>. For

33 instance, DN neurons exhibit ramping activity predictive of the timing and direction of the self-initiated  
34 saccades<sup>17,18</sup>. Although these results suggest that the cerebellum participates in programming future  
35 actions, its contribution to preparatory activity in the neocortex during goal-directed behaviour remains  
36 to be determined.

37 We developed a visuomotor task in which mice ran through a virtual corridor comprising salient  
38 visual cues to reach a defined location where a reward was delivered (**Fig. 1a,b**; see Methods). Within a  
39 week of training, mice learned to estimate the reward location from visual cues, and adjusted their  
40 behaviour accordingly, by running speedily through the corridor before decelerating abruptly and licking  
41 upon reward delivery (**Fig. 1c-e**, Extended Data Fig. 1a-c). This behavioural progress was apparent during  
42 each session, as the number of false alarm licks outside of the reward zone decreased within tens of  
43 trials (Extended Data Fig. 1d), while deceleration and lick onsets emerged in anticipation of reward (**Fig.**  
44 **1c-e**; Extended Data Fig. 1e).

45 To identify a cerebellar region integrating visuomotor signals from the neocortex, we stimulated  
46 electrically the primary visual (V1) and limb motor cortex (IM1) while looking for hemodynamic signals  
47 over the dorsal surface of the lateral cerebellum (Extended Data Fig. 2). We found a region in the lateral  
48 part of Crus1 that uniquely responded to both activation of V1 and IM1. As Crus1 projects to the  
49 dentate nucleus (DN)<sup>19,20</sup>, we used silicon probes to record spiking activity of cerebellar output neurons  
50 in the DN to assess the involvement of the visuomotor cerebellum during the task (**Fig. 1f**). We identified  
51 the neural correlates of running, licking, or reward context in the reward zone by applying a generalised  
52 linear model (GLM)<sup>21</sup> to classify DN neurons according to running speed, lick times, reward time, and  
53 visual cues (see Methods). Fifty percent of all recorded DN neurons ( $n = 362$ , 16 mice) could not be  
54 classified according to any of the task variables. The activity of 64% of classified DN neurons was related  
55 to reward time (**Fig. 1g**, see below). The activity of other neurons was related to lick times, running, or a  
56 mixture of either plus reward times, but none had activity associated with the visual cues (**Fig. 1g**).

57 Of neurons whose activity was modulated by reward timing, 16% of neurons ( $n = 17$ ) ramped up  
58 their activity a few seconds before reward delivery and stopped firing abruptly thereafter (classified as  
59 ‘type 1’ neurons; see <sup>22</sup>; **Fig. 1i**); 32% of neurons ( $n = 36$ ) exhibited activity modulation before and after  
60 reward delivery (‘type 2’; **Fig. 1j**); 52% of neurons ( $n = 59$ ) were active just after reward delivery (‘type  
61 3’; **Fig. 1k**). Accordingly, DN population activity tiled the time period around reward delivery (**Fig. 1l**).  
62 Cross-covariance analysis between firing rate and lick rate revealed that preparatory activity arises long  
63 before the time of the reward (**Fig. 1m**). Type 1 and type 2 neurons’ spiking preceded lick rate by 750  
64 and 650 ms, respectively, on average, while type 3 neurons’ spiking lagged lick rate by 170 ms, on

65 average (**Fig. 1m,n**). Moreover, type 1 DN neuron activity was anti-correlated with running speed and  
66 led its changes by 1.1 s on average. (**Fig. 1o,p**).

67 To verify that the activity of type 1-3 DN neurons was specific to reward context (**Fig. 1q**), we  
68 examined whether their firing was directly related to changes in motor output or visual input.  
69 Specifically, their activity was not modulated by deceleration events (**Fig. 1r**) or licking bouts outside of  
70 the reward zone (**Fig. 1s**), nor by the appearance of non-rewarded checkerboards in a different segment  
71 of the virtual corridor (**Fig. 1t**). Instead type 1-3 DN neurons were mainly active around the time of  
72 reward delivery (**Fig. 1q-t**). Taken together, these results suggest that DN neurons encode reward time-  
73 related information or actions plans required for obtaining reward.

74 To gain insight in how ramping activity could emerge in DN neurons that are under the control  
75 of the cerebellar cortex, we recorded from putative inhibitory Purkinje cells (PCs) in lateral Crus1 (**Fig.**  
76 **2a,b**). The firing of PCs was modulated on the same time scale around the time of reward delivery as  
77 simultaneously recorded DN neurons (**Fig. 2c-n**). However, the majority of PCs ramped down their  
78 activity prior to reward (**Fig. 2p**), while DN neurons exhibited both activity increases or decreases (**Fig.**  
79 **2o**). Accordingly, the average z-score of PC firing in the last second preceding reward was negative (-0.14  
80 +/- 0.35, n = 83, p < 0.0001), in contrast to DN neurons (0.05 +/- 0.51, n = 77, p = 0.4, PC vs DN: p =  
81 0.0007, **Fig. 2q**). PCs provide inhibitory synapses onto DN neurons. To test if the recorded regions of  
82 Crus I and DN were directly connected, we computed the cross-correlogram between all pairs of  
83 simultaneously recorded neurons. A small fraction of these correlograms showed significant modulation  
84 (56/2163, see Methods), on average exhibiting a millisecond-latency trough, consistent with  
85 monosynaptic inhibition from PC to DN neurons (**Fig. 2r**). Over longer timescale, individual pairs often  
86 displayed large negative cross-covariance (**Fig. 2s**, see Methods), indicating that cells are anti-correlated.  
87 The average cross-covariance between all pairs measured before the reward (**Fig. 2t**) revealed that PC  
88 activity preceded suppression of DN neuron responses at a lag of ~550ms. Thus the ramping down of PC  
89 activity may relieve DN neurons of inhibition and allow extra-cerebellar inputs (ref) to drive the ramping  
90 activity in anticipation of reward.

91 The firing profiles observed in DN were reminiscent of activity patterns recorded in motor-  
92 related areas of neocortex during movement planning and execution<sup>22</sup>. Specifically, the pre-reward  
93 ramping activity of type 1 and type 2 DN neurons closely resembled preparatory activity of neurons in  
94 ALM, which become active as mice prepare for licking<sup>23</sup>. Furthermore, their activity strongly resembles  
95 that of DN neurons in primates that have been shown to control the preparation and timing of voluntary  
96 saccades<sup>17,18</sup>. Given the substantial lead times of type 1 and some type 2 DN neuron activities over lick

97 rate and running speed changes, these neurons might encode the conjunction of reward anticipation  
98 and motor plans, and thus contribute to motor preparation for licking to the upcoming reward.

99 Since DN neurons project to ventral thalamus<sup>8,11,12,24</sup>, which has been shown to participate in the  
100 maintenance of preparatory activity in mouse ALM neocortex<sup>24</sup>. Since DN neurons project to ventral  
101 thalamus<sup>8,11,12,24</sup>, which has been shown to participate in the maintenance of preparatory activity in  
102 mouse ALM neocortex<sup>24</sup>, we investigated whether DN activity could influence ALM processing. We first  
103 verified whether ALM neurons were engaged during our behavioural task, especially during the  
104 transition period between running and licking around reward delivery (**Fig. 3a,b**). The activity of 51% of  
105 putative ALM pyramidal cells (see Methods) was correlated with task variables according to GLM ( $n =$   
106  $147/288$ , 4 mice). We found that the activity of 86% of those units was related to reward time, including  
107 neurons with ramping activity a few seconds before reward delivery which terminated abruptly  
108 thereafter (classified as ‘type 1’,  $n = 16$ , **Fig. 3f,c,g**), neurons active before and after reward delivery  
109 (‘type 2’,  $n = 42$ , **Fig. 3f,d,g**), or neurons active after reward delivery (‘type 3’,  $n = 66$ , **Fig. 3f,e,g**),  
110 consistent with previous reports in ALM<sup>22</sup>. Type 1-3 neuronal activity in ALM substantially co-varied with  
111 lick rate (**Fig. 3h**) and preceded it by 840, 500, and 240 ms on average (**Fig. 3i**). Moreover, type 1-2  
112 neuronal activity also preceded running speed changes (**Fig. 3j**), albeit with anti-correlation, by 1170 ms  
113 and 200 ms on average, respectively (**Fig. 3k**). Finally, type 1-3 ALM neurons were not modulated by  
114 changes in motor behaviour or visual input outside of the reward zone (**Fig. 3l-o**). Thus, the temporal  
115 profiles of neuronal firing in ALM and their relationship to motor behaviour were similar to the majority  
116 of neurons in DN (**Fig. 1**).

117 To determine the contribution of DN firing on ALM preparatory activity, we silenced DN output  
118 by photoactivating cerebellar PCs expressing channelrhodopsin-2 under the control of the specific  
119 Purkinje cell protein (PCP2) promoter (**Fig. 4a**, see Methods). The activation of PCs in lateral Crus 1 was  
120 set to begin at 20 cm distance before the reward position in the virtual corridor (**Fig. 1b**) to occur  
121 approximately 1 s before reward and to terminate around reward delivery. Simultaneous silicone probe  
122 recordings from DN and ALM (**Fig. 4a**) revealed that optogenetic activation of PCs effectively silenced  
123 most DN neurons (**Fig. 4b**; Extended Data Fig. 3a) regardless of response type (**Fig. 4l,m**, firing rate  
124 control vs PC photoactivation:  $43.56 \pm 30.57$  Hz vs  $8.08 \pm 21.06$  Hz, 81 % decrease,  $p < 0.0001$ ,  $n = 47$ ,  
125 3 mice). PC photoactivation also robustly suppressed activity in a large fraction of ALM neurons ( $n =$   
126  $72/189$ , 3 mice; **Fig 4c-k,n,o**; Extended Data Fig. 3b). Most type 1 and type 2 neurons were robustly  
127 suppressed by PC photoactivation (respectively, 10/12 and 30/43 cells, **Fig. 4c,d,n**), such that, on  
128 average, their firing rate decreased to baseline activity levels (Type 1 control:  $17.31 \pm 14.95$  Hz vs

129 photoactivation: 10.10 +/- 13.10 Hz,  $n = 12$ ,  $p = 0.0005$ ; Type 2 control: 20.44 +/- 16.40 Hz vs  
130 photoactivation: 11.15 +/- 11.66 Hz,  $n = 43$ ,  $p < 0.0001$ , **Fig. 4h,i,o**), respectively. Type 3 and unclassified  
131 ALM neurons exhibited a mixture of effects, including a fraction of units that were excited (**Fig. 4e,p**),  
132 and their population activity during PC photoactivation remained unaffected on average (respectively  
133 8.06 +/- 8.47 Hz vs 6.97 +/- 8.94 Hz,  $p = 0.06$ ,  $n = 38$  and 10.60 +/- 11.79 Hz vs 10.65 +/- 12.30 Hz,  $p =$   
134 0.7,  $n = 96$ , **Fig. 4j,k,n,o**). In trials with PC photoactivation, mice transiently decreased their running  
135 speed approximately 150 ms after light onset (**Fig. 4f**, curve; Extended Data Fig. 3c), reaching the reward  
136 later (**Fig. 4f**, histograms) and licking at that time (**Fig. 4g**). As Type 3 cells were modulated by reward  
137 their firing peaked later in photoactivation trials (**Fig. 4j**) but remained aligned to reward delivery  
138 (Extended Data Fig. 4). The inhibition of neuronal activity was not a consequence of running speed  
139 change because the onset of the firing rate decrease was almost immediate in DN neurons (3 ms, see  
140 Methods), and was 9 ms for type 1 and 2 ALM neurons (**Fig. 4q,r**), and a significant decrease in ALM  
141 activity during PC photoactivation was observed before any change in running speed (10-120 ms from  
142 photoactivation onset; Type 1 control: 17.37 +/- 14.74 Hz vs photoactivation: 12.00 +/- 13.57,  $n = 12$ ,  $p =$   
143 0.001; Type 2 control: 18.84 +/- 15.15 Hz vs photoactivation: 14.55 +/- 13.57,  $n = 43$ ,  $p = 0.0002$ ; control  
144 running speed: 17.1 +/- 6.7 cm/s vs photoactivation 17.8 +/- 6.1,  $p = 0.17$ ; Extended Data Fig. 3c).  
145 Moreover, the persistence of decreased activity in type 1 and 2 ALM neurons during the photoactivation  
146 period could not be explained by the decrease in running speed as their activity is not affected by mouse  
147 deceleration outside of the reward zone (**Fig. 1r**). The short-latency suppression of ALM activity was  
148 consistent with the time delay expected for the withdrawal of excitation via the disynaptic pathway  
149 from DN to ALM via the thalamus. The existence of ALM neurons that increased their activity following  
150 PC activation (30/100, **Fig. 4p**) suggests an additional feedforward inhibitory circuit. Together, these  
151 data indicate that DN provides preferential drive to the majority of ALM neurons exhibiting preparatory  
152 activity (type 1 and type 2 cells). We suggest that the maintenance of preparatory activity in ALM  
153 requires short-latency, excitatory feedback from the cerebellum.

154 Our results reveal the key contribution of the cerebellum in the generation of activity in the  
155 neocortex that emerges in anticipation of reward delivery. The dentate nucleus exhibits preparatory  
156 signals prior to reward that resemble those in the neocortex during motor preparation (**Fig. 1 & 3**; see  
157 also<sup>22,25,26</sup>). Silencing dentate activity by photoactivation of Purkinje cells in cerebellar cortex caused a  
158 short-latency suppression of the majority of ALM neurons exhibiting preparatory activity. This result is  
159 consistent with observations that the dentate nucleus provides direct excitatory input to the  
160 thalamus<sup>8,10-12</sup>, which itself is essential for the maintenance of persistent activity in the neocortex<sup>24,27,28</sup>

161 Thus, the cerebellum has a specific and fast driving influence on motor cortex activity in anticipation of  
162 goal-directed actions.<sup>8,10-12</sup> Thus, the cerebellum has a specific and fast driving influence on motor  
163 cortex activity in anticipation of goal-directed actions. Our data are in agreement with results from  
164 human case studies which propose that the cerebellum is a crucial component of a circuit involving  
165 motor thalamus and neocortex in the preparation of self-timed movements<sup>29,30</sup>.

166 The cerebellum is known for its remarkable ability to learn the fine-scale temporal associations  
167 between internal and external context and specific actions<sup>1,31,32</sup>. We suggest that the preparatory  
168 activity originating within motor-related areas of the neocortex is conveyed to the cerebellum via the  
169 cortico-pontine-mossy fiber pathway where it may be combined with reward prediction signals<sup>15</sup> to  
170 adjust the timing of activity in preparation of goal-directed movements. The activity of Purkinje cells  
171 and dentate neurons is consistent with this hypothesis; a large fraction Purkinje cells decreased their  
172 activity in anticipation of reward, potentially shaping the ramping rate of preparatory activity in DN  
173 which peaks at the time of reward delivery. Thus, while preparatory signals may originate in the  
174 neocortex, the cerebellum is a key component that contributes to the timing of anticipatory activity that  
175 is maintained in the thalamocortical loop.

176 Given that multiple closed-loop circuits have been identified between the subdivisions of  
177 cerebellum and the neocortex<sup>4,10,11,33,34</sup> we suggest that ALM and the lateral Crus 1-dentate cerebellar  
178 pathway constitutes one such circuit dedicated to the generation of precisely-timed preparatory activity.  
179 Moreover, the deep cerebellar nuclei that send excitatory projections to other thalamic regions sub-  
180 serving non-motor cortical areas<sup>4,10,11</sup> may contribute to the maintenance of persistent neocortical  
181 activity during cognitive tasks requiring attention and working memory<sup>35-37</sup>. More generally, our data  
182 add to the growing body of evidence that persistent activity in the neocortex is not a result of recurrent  
183 neural interactions within local circuits, but instead requires the coordination of activity across distal  
184 brain regions<sup>24,27,28</sup>.

185

## 186 **Acknowledgements**

187 We thank Mateo Velez-Fort and Francesca Greenstreet for help with experiments, and David Digregorio,  
188 Tom Otis, Marcus Stephenson-Jones and Petr Znamenskiy for constructive ideas and discussions about  
189 this work. The research was funded by the Biozentrum core funds, ERC Consolidator Grant and SNSF  
190 Project grant.

## 191 **Author contributions**

192 F.C. performed experiments. F.C. and A.B. analysed the data. All authors wrote the manuscript.

## 193 **Methods**

194 **Animal care and housing.** All experimental procedures were carried out in accordance with institutional  
195 animal welfare guidelines, and licensed by the Veterinary Office of the Canton of Basel, Switzerland. For  
196 this study we used 22 male C57BL6 mice (supplied by Janvier labs) aged > 60 days postnatal and 7 mice  
197 from a transgenic cross between Ai32(RCL-ChR2(H134R)/EYFP) and STOCK Tg(Pcp2-cre)1Amc/J lines.  
198 Animals were housed in a reverse 12:12 hour light/dark cycle and were food-restricted starting a week  
199 after surgery with maximum 20% weight loss. Surgical procedures were carried out aseptically on  
200 animals subcutaneously injected with atropine (0.1 mg kg<sup>-1</sup>), dexamethasone (2mg kg<sup>-1</sup>), and a general  
201 anesthetic mixed comprising fentanyl (0.05 mg kg<sup>-1</sup>), midazolam (5mg kg<sup>-1</sup>), and medetomidine (0.5mg  
202 kg<sup>-1</sup>). Animals were injected an analgesic (buprenorphine, 0.1 mg kg<sup>-1</sup>), and antibiotics (enrofloxacin, 5  
203 mg kg<sup>-1</sup>) at least 15 minutes prior to the end of the surgery and once every day for two days post-  
204 surgery. For intrinsic imaging mice were under 1-2% isoflurane anesthesia. For acute  
205 electrophysiological recordings mice were put under 1-2% isoflurane anesthesia during the craniotomy  
206 procedure and allowed to recover for 1-2 hours before recording.

207  
208 **Behaviour.** Mice were trained for 1-2 weeks to run head-fixed on a Styrofoam cylinder in front of two  
209 computer monitors placed 22 cm away from the mouse eyes. Running speed was calculated from the  
210 tick count of an optical rotary encoder placed on the axis of the wheel with a Teensy USB development  
211 board, and was fed back as position to a Unity software to display visual flow of a virtual corridor using a  
212 MATLAB-based script. A reward delivery spout was positioned under the snout of the mouse from which  
213 a drop of soy milk was delivered at a defined position inside the corridor (at 360 cm from start). Licks  
214 were detected with a piezo disc sensor placed under the spout and signals were sent to the Teensy USB  
215 development board and extracted as digital signals. The virtual corridor was composed of a black and  
216 white random dot pattern on a grey background (80 cm long) followed by black and white checkerboard  
217 (40 cm long), black and white random triangle pattern on a grey background (80 cm long), vertical black  
218 and white grating (40 cm long), black and white random square pattern on a grey background (80 cm  
219 long), and a final black and white checkerboard inside which reward was delivered 40 cm from its  
220 beginning. Two seconds following reward delivery the mouse was allowed to move freely inside the  
221 virtual checkerboard pattern, after which the corridor was reset to the starting position. Mice were  
222 initially trained on a short version of the corridor (20, 10, 20, 10, 20 cm length for each visual pattern  
223 respectively, and reward position at 90 cm), before extending the corridor to full length in expert mice.  
224 Appearance of the visual patterns inside the virtual corridor was signalled by TCP when the mouse



225 reached the corresponding position in the virtual corridor. In 2/3 mice shown in **Figure 4**, the corridor  
226 started at 120 cm distance from start in order to increase the number of trials.

227

228 **Virus and tracer injection.** AAV2/1-Ef1a-eGFP-WPRE (30nl,  $1.5 \times 10^{11}$  titre) was injected over 15-30 minutes  
229 with a *Toohey Spritzer Pressure System* (*Toohey Company*) with pulse duration from 5 to 20 milliseconds  
230 delivered at 1Hz with pressure between 5 and 15 psi into the left cerebellar crus 1 at the following  
231 coordinates: 6 millimetres posterior to Bregma, 3.3 mm Medio lateral, and at a depth of 200  $\mu\text{m}$ . Two  
232 weeks after injection mice were euthanized with a dose of pentobarbital ( $80 \text{ mg kg}^{-1}$ ) and transcardially  
233 perfused with 4% paraformaldehyde. Perfused brains were put inside a block of agarose and sliced at  
234 100  $\mu\text{m}$  with a microtome. Slices were then mounted with a mixture of mounting medium and DAPI  
235 staining and imaged on a Zeiss LSM700 confocal microscope with a 40X oil objective.

236

237 **Intrinsic signal imaging.** Mice were anesthetized under 1-2% isoflurane and placed in a stereotaxic  
238 frame. A scalp incision was made along the midline of the head and the skull was cleaned and scraped.  
239 Two 80  $\mu\text{m}$  tungsten wires (GoodFellow) were inserted inside polyimide tubes (230  $\mu\text{m}$  O.D., 125  $\mu\text{m}$   
240 I.D.) and implanted 300  $\mu\text{m}$  apart into the right primary visual (VisP) and limb motor cortex (IM1)  
241 following stereotaxic coordinates (2.7 posterior and 2.5 mm lateral to bregma, 0.25 anterior and 1.5 mm  
242 lateral to bregma, respectively) at 800  $\mu\text{m}$  depth from the surface of the brain. Dental cement was  
243 added to join the wires to the skull. Neck muscles covering the bone over the cerebellum on the left side  
244 were gently detached and cut with fine scissors. The surface of the cerebellum was then carefully  
245 cleaned.

246 Animals were then placed inside a custom-built frame in order to incline the head and expose  
247 the surface of the bone above the cerebellum for imaging with a tandem lens macroscope. Mineral oil  
248 was applied to allow imaging through the bone. The mouse was lightly anaesthetized with 0.5-1%  
249 isoflurane and the body temperature monitored with an anal probe and maintained at 37°C. The  
250 preparation was illuminated with 700 nm light from an LED source and the imaging plane was focused  
251 800  $\mu\text{m}$  below the skull surface. Images were acquired through a bandpass filter centered at 700 nm  
252 with 10 nm bandwidth (Edmund Optics) at 6.25 Hz with a 12-bit CCD camera (1300QF; VDS Vossküller)  
253 connected to a frame grabber (PCI-1422; National Instruments).

254 Tungsten wires were clamped with micro alligator clips and connected to a stimulus isolator  
255 (A395; World Precision Instruments). After a 10 s long baseline, trains of 700  $\mu\text{A}$  stimuli were delivered  
256 at 6Hz with pulse duration of 200  $\mu\text{s}$  for 3 s to each cortical area alternatively, followed by a 10 s long



257 recovery phase. Averages of 20 trials were calculated and hemodynamic signals were measured relative  
258 to the last 3 s before stimulation ( $\Delta F/F_0$ ). Location of tungsten electrodes inside the neocortex were  
259 confirmed post-hoc with Dil labeling of the tracts.

260

261 **Extracellular electrophysiology.** Mice were anaesthetized according to the surgical procedure described  
262 in the animal care and housing section and placed into a stereotaxic frame. The skin over the skull was  
263 incised along the midline and the skull was cleaned and scrapped. A headplate was then attached to the  
264 skull in front of the cerebellum using Super Bond dental cement. For cerebellar recordings the neck  
265 muscles covering the bone were gently detached and cut with fine scissors on the left side. The surface  
266 of the skull over the cerebellum was then cleaned, a small piece of curved plastic was glued to the base  
267 of the exposed skull in order to support a well attached to the headplate and built up with dental  
268 cement and Tetric EvoFlow. The well was then filled with Kwik-Cast sealant. For the simultaneous  
269 recordings in cerebellum and ALM, a small additional well was built around stereotaxically-defined  
270 coordinates for the right ALM (2.3 mm anterior and 1.5 mm lateral to bregma).

271 On the day of the recording mice were anaesthetized under 1-2% isoflurane and small  
272 craniotomies (1mm diameter) were made above left lateral crus 1 (6 mm posterior and 3.3 mm lateral  
273 to bregma), left dentate nucleus (6 mm posterior, and 2.25 mm lateral to bregma), and/or right ALM  
274 (2.3 mm anterior and 1.5 mm lateral to bregma). Mice were allowed to recover from surgery for 1-2  
275 hours before recording. Mice were then head-fixed over a Styrofoam cylinder. The well(s) around the  
276 craniotomy were filled with cortex buffer containing (in mM) 125 NaCl, 5 KCl, 10 Glucose monohydrate,  
277 10 Hepes, 2 MgSO<sub>4</sub> heptahydrate, 2 CaCl<sub>2</sub> adjusted to pH 7.4 with NaOH. A silver wire was placed in the  
278 bath for referencing. Extracellular spikes were recorded using NeuroNexus silicon probes (A2x32-5mm-  
279 25-200-177-A64). The 64- or 128-channel voltages were acquired through amplifier boards (RHD2132,  
280 Intant Technologies) at 30 kHz per channel, serially digitized and send to an Open Ephys acquisition  
281 board via a SPI interface cable.

282

283 **Photoactivation.** A 200  $\mu\text{m}$  diameter optical fiber was placed on top of the surface of lateral Crus1 using  
284 a manual micromanipulator. Light was delivered by a 100 mW 473 nm laser (CNI, MBL-III-473) triggered  
285 by a Pulse Pal pulse train generator (Open Ephys). To prevent mice from seeing the laser light, a masking  
286 470 nm light from a fiber-coupled LED (Thorlabs) was placed in front of the connector between the  
287 patch cable and the optical fiber and turned on during the whole recording session. Mice were also  
288 trained in the presence of LED light. Black varnish was painted over the cement well surrounding the

289 craniotomy and black tape was wrapped around the connection between the patch cable and the  
290 optical fiber. One-second square light pulses (5 to 10 mW) were randomly delivered in 40 % of trials.  
291 Control trials from mice that experienced photoactivation were not included in **Figures 1-3** to avoid  
292 confounding effects such as plasticity-induced change in neuronal activity.

293

#### 294 **Electrophysiology data analysis.**

295 Spikes were sorted with Kilosort (<https://github.com/cortex-lab/Kilosort>) using procedures previously  
296 described<sup>38</sup>. Briefly, the extracellular voltage recordings were high-pass filtered at 300 Hz, the effect of  
297 recording artifacts and correlated noise across channels were reduced using common average  
298 referencing and data whitening respectively. Putative spikes were detected using an amplitude  
299 threshold (4 s.d. of baseline) over the filtered voltage trace and matched to template waveforms. The  
300 firing rate for each unit was estimated by convolving a Gaussian kernel with spike times,  $\sigma$  was chosen  
301 according to the median inter-spike interval of each individual unit (**Fig. 1 & 2**). ALM units were classified  
302 as putative pyramidal neurons or fast-spiking interneurons based on spike width as described in<sup>39</sup>.

303 For population scatter plots (**Fig. 1-3**) and averaging across neuronal activities grouped by type  
304 (**Fig. 1, 3**) we used the z-score of firing rates. For data plotted in **Figures 1q,s and 3l,n** the spike times of  
305 PCs and DN neurons were binned by 10 ms. The cross-covariance between firing rates of PC and DN  
306 pairs was then corrected for correlated firing resulting from stimulus effects by subtracting the cross-  
307 covariance between shuffled trials and was then normalized by the variance of the firing rates.

308 The cross-correlogram between each PC and DN cell simultaneously recorded ( $n = 2163$  pairs, 3  
309 mice) was computed with a bin of 1 ms (**Fig. 2r**). A correlogram was considered as modulated if at least  
310 two consecutive bins in the 20 ms following the Purkinje cell spike were above 3 std of the baseline  
311 computed in the [-50, -10] window. For all these pairs (56/2163) the cross-correlogram was z-scored by  
312 the mean/std of this baseline and all z-scored correlogram were averaged.

313 On longer time scale, task modulation of the cells entrains instabilities of the firing rate that  
314 might produce spurious covariance between co-modulated pairs. To assess the relation between PC  
315 activity and DN neuron activity on these time scale we used two equivalent methods. In **Figure 2s**, we  
316 used the cross-covariance as described above. In **Figure 2t**, the cross-correlogram between each pair  
317 was first calculated on each trial in the last 10 second before the reward ( $CC_{raw}$ ). We then computed the  
318 cross-correlogram for the same pair but using trial  $n$  and  $n+1$  ( $CC_{shuffled}$ ). The shuffled corrected  
319 correlogram was then defined as  $(CC_{raw} - CC_{shuffled}) / \sqrt{CC_{shuffled}}$  and averaged across pairs.

320 ALM cells were considered modulated by cerebellar photoactivation if the average firing rate in  
321 the second following the onset of photostimulation was significantly (ranksum, alpha of 0.05) different  
322 from the average firing rate during the same window in control trials. We classified them as  
323 excited/inhibited if the control response was lower/higher than that during photoactivation trials.  
324 Average firing rate of the population in the same 1s window were compared between control and  
325 photoactivation condition using signrank test (alpha 0.05). Z-scored activity profiles were obtained for  
326 each cell by subtracting the average firing rate of the cell across the whole recording from the cell  
327 average activity profile in Hz and dividing it by the std of the firing rate. The z-scored activity profiles  
328 were then averaged together to generate the population activity profile (**Fig. 4 h-k,q,r**). The onset of  
329 inhibition (**Fig. 2 r,t** and **4 q,r**) was measured as the first 1 ms bin after 0 where the crosscorrelogram  
330 was below 3 std of a baseline measured in the preceding 20 ms.

331  
332 **Generalized linear model.** We used neuroGLM (<https://github.com/pillowlab/neuroGLM.git>) to classify  
333 neuronal responses with models obtained from linear regression between external covariates and spike  
334 trains in single trials. Spike trains were discretized into 1 ms bins and each external event was  
335 represented as follows: running speed was added as a continuous variable. Reward times, lick times, and  
336 visual cue times were represented as boxcar functions convolved with smooth temporal basis functions  
337 defined by raised cosine bumps separated by  $\pi/2$  radians (25 ms). The resulting basis functions covered  
338 a -4 to 2 s window centred on reward time, and -2 to 2 s windows for lick and visual cue times. We then  
339 computed Poisson regression between spike trains and the basis functions and running speed. The  
340 resulting weight vectors were then convolved with event times and linearly fitted with the spike times  
341 peri-stimulus time histograms smoothed with a 25 ms Gaussian to compute the coefficient of  
342 determination for each trial. We divided the fit between reward times model and firing rates in two time  
343 windows: -4 to 0 s and 0 to 2s relative to reward time to differentiate between pre- and post-reward  
344 neuronal activity. Fits with mean coefficient of determination across trials exceeding 0.1 were selected  
345 to classify units.

346

347 **References**

- 348 1. Mauk, M. D. & Buonomano, D. V. the Neural Basis of Temporal Processing. *Annu. Rev. Neurosci.*  
349 **27**, 307–340 (2004).
- 350 2. Leergaard, T. B., Lillehaug, S., De Schutter, E., Bower, J. M. & Bjaalie, J. G. Topographical  
351 organization of pathways from somatosensory cortex through the pontine nuclei to tactile  
352 regions of the rat cerebellar hemispheres. *Eur. J. Neurosci.* **24**, 2801–2812 (2006).
- 353 3. Suzuki, L., Coulon, P., Sabel-Goedknegt, E. H. & Ruigrok, T. J. H. Organization of Cerebral  
354 Projections to Identified Cerebellar Zones in the Posterior Cerebellum of the Rat. *J. Neurosci.* **32**,  
355 10854–10869 (2012).
- 356 4. Proville, R. D. *et al.* Cerebellum involvement in cortical sensorimotor circuits for the control of  
357 voluntary movements. *Nat. Neurosci.* **17**, 1233–1239 (2014).
- 358 5. Jörntell, H. & Ekerot, C. F. Topographical organization of projections to cat motor cortex from  
359 nucleus interpositus anterior and forelimb skin. *J. Physiol.* **514**, 551–566 (1999).
- 360 6. Lu, X., Miyachi, S., Ito, Y., Nambu, A. & Takada, M. Topographic distribution of output neurons in  
361 cerebellar nuclei and cortex to somatotopic map of primary motor cortex. *Eur. J. Neurosci.* **25**,  
362 2374–2382 (2007).
- 363 7. Person, A. L. & Raman, I. M. Purkinje neuron synchrony elicits time-locked spiking in the  
364 cerebellar nuclei. *Nature* **481**, 502–505 (2012).
- 365 8. Ichinohe, N., Mori, F. & Shoumura, K. A di-synaptic projection from the lateral cerebellar nucleus  
366 to the laterodorsal part of the striatum via the central lateral nucleus of the thalamus in the rat.  
367 *Brain Res.* **880**, 191–197 (2000).
- 368 9. Sawyer, S. F., Tepper, J. M. & Groves, P. M. Cerebellar-responsive neurons in the thalamic  
369 ventroanterior-ventrolateral complex of rats: Light and electron microscopy. *Neuroscience* **63**,  
370 725–745 (1994).
- 371 10. Kelly, R. M. & Strick, P. L. Cerebellar loops with motor cortex and prefrontal cortex of a  
372 nonhuman primate. *J. Neurosci.* **23**, 8432–8444 (2003).
- 373 11. Middleton, F. A. & Strick, P. L. Cerebellar output channels. *Int. Rev. Neurobiol.* **41**, 61–82 (1997).
- 374 12. Thach, W. T. & Jones, E. G. The cerebellar dentatothalamic connection: terminal field, lamellae,  
375 rods and somatotopy. *Brain Res.* **169**, 168–172 (1979).
- 376 13. Huang, C. C. *et al.* Convergence of pontine and proprioceptive streams onto multimodal  
377 cerebellar granule cells. *Elife* **2013**, 1–17 (2013).
- 378 14. Kennedy, A. *et al.* A temporal basis for predicting the sensory consequences of motor commands  
379 in an electric fish. *Nat. Neurosci.* **17**, 416–422 (2014).
- 380 15. Wagner, M. J., Hyun Kim, T., Savall, J., Schnitzer, M. J. & Luo, L. Cerebellar granule cells encode  
381 the expectation of reward. *Nat. Lett.* 1–18 (2017). doi:10.1038/nature21726
- 382 16. Giovannucci, A. *et al.* Cerebellar granule cells acquire a widespread predictive feedback signal

- 383 during motor learning. *Nat. Neurosci.* **20**, 727–734 (2017).
- 384 17. Ashmore, R. C. & Sommer, M. A. Delay activity of saccade-related neurons in the caudal dentate  
385 nucleus of the macaque cerebellum. *J. Neurophysiol.* **109**, 2129–2144 (2013).
- 386 18. Ohmae, S., Kunimatsu, J. & Tanaka, M. Cerebellar Roles in Self-Timing for Sub- and Supra-Second  
387 Intervals. *J. Neurosci.* **37**, 3511–3522 (2017).
- 388 19. Dietrichs, E. The cerebellar corticonuclear and nucleocortical projections in the cat as studied  
389 with anterograde and retrograde transport of horseradish peroxidase - V. The posterior lobe  
390 vermis and the flocculo-nodular lobe. *Anat. Embryol. (Berl)*. **167**, 449–462 (1983).
- 391 20. Sun, L. W. Viral and Non-viral Tracing of Cerebellar Corticonuclear and Vestibulorubral  
392 Projections in the Mouse. *Open J. Neurosci.* **3**, 1–15 (2013).
- 393 21. Park, I. M., Meister, M. L. R., Huk, A. C. & Pillow, J. W. Encoding and decoding in parietal cortex  
394 during sensorimotor decision-making. *Nat Neurosci* **17**, 1395–1403 (2014).
- 395 22. Svoboda, K. & Li, N. Neural mechanisms of movement planning: motor cortex and beyond. *Curr.*  
396 *Opin. Neurobiol.* **49**, 33–41 (2018).
- 397 23. Li, N., Chen, T.-W., Guo, Z. V, Gerfen, C. R. & Svoboda, K. A motor cortex circuit for motor  
398 planning and movement. *Nature* **519**, 51–56 (2015).
- 399 24. Guo, Z. V. *et al.* Maintenance of persistent activity in a frontal thalamocortical loop. *Nature* **545**,  
400 181–186 (2017).
- 401 25. Murakami, M., Vicente, M. I., Costa, G. M. & Mainen, Z. F. Neural antecedents of self-initiated  
402 actions in secondary motor cortex. *Nat. Neurosci.* **17**, 1574–1582 (2014).
- 403 26. Rickert, J., Riehle, A., Aertsen, A., Rotter, S. & Nawrot, M. P. Dynamic Encoding of Movement  
404 Direction in Motor Cortical Neurons. *J. Neurosci.* **29**, 13870–13882 (2009).
- 405 27. Reinhold, K., Lien, A. D. & Scanziani, M. Distinct recurrent versus afferent dynamics in cortical  
406 visual processing. *Nat. Neurosci.* **18**, (2015).
- 407 28. Schmitt, L. I. *et al.* Thalamic amplification of cortical connectivity sustains attentional control.  
408 *Nature* **545**, 219–223 (2017).
- 409 29. Diener, H. C., Dichgans, J., Guschlbauer, B., Bacher, M. & Langenbach, P. Disturbances of motor  
410 preparation in basal ganglia and cerebellar disorders. *Prog. Brain Res.* **80**, 480–481 (1989).
- 411 30. Purzner, J. *et al.* Involvement of the Basal Ganglia and Cerebellar Motor Pathways in the  
412 Preparation of Self-Initiated and Externally Triggered Movements in Humans. *J. Neurosci.* **27**,  
413 6029–6036 (2007).
- 414 31. Perrett, S. P., Ruiz, B. P. & Mauk, M. D. Cerebellar cortex lesions disrupt learning-dependent  
415 timing of conditioned eyelid responses. *J. Neurosci.* **13**, 1708–1718 (1993).
- 416 32. Kotani, S., Kawahara, S. & Kirino, Y. Purkinje cell activity during learning a new timing in classical  
417 eyeblink conditioning. *Brain Res.* **994**, 193–202 (2003).

- 418 33. Ramnani, N. The primate cortico-cerebellar system: anatomy and function. *Nat. Rev. Neurosci.* **7**,  
419 511–522 (2006).
- 420 34. Habas, C. *et al.* Distinct Cerebellar Contributions to Intrinsic Connectivity Networks. *J. Neurosci.*  
421 **29**, 8586–8594 (2009).
- 422 35. Baumann, O. *et al.* Consensus Paper: The Role of the Cerebellum in Perceptual Processes. *The*  
423 *Cerebellum* 197–220 (2014). doi:10.1007/s12311-014-0627-7
- 424 36. Sokolov, A. A., Miall, R. C. & Ivry, R. B. The Cerebellum: Adaptive Prediction for Movement and  
425 Cognition. *Trends Cogn. Sci.* **21**, 313–332 (2017).
- 426 37. Strick, P. L., Dum, R. P. & Fiez, J. a. Cerebellum and nonmotor function. *Annu. Rev. Neurosci.* **32**,  
427 413–434 (2009).
- 428 38. Pachitariu, M., Steinmetz, N., Kadir, S., Carandini, M. & Harris, K. D. Kilosort: realtime spike-  
429 sorting for extracellular electrophysiology with hundreds of channels. *bioRxiv* 61481 (2016).  
430 doi:10.1101/061481
- 431 39. Guo, Z., Li, N., Huber, D., Ophir, E. & Gutnisky, D. Flow of Cortical Activity Underlying a Tactile  
432 Decision in Mice. *Neuron* **81**, 179–194 (2014).
- 433
- 434



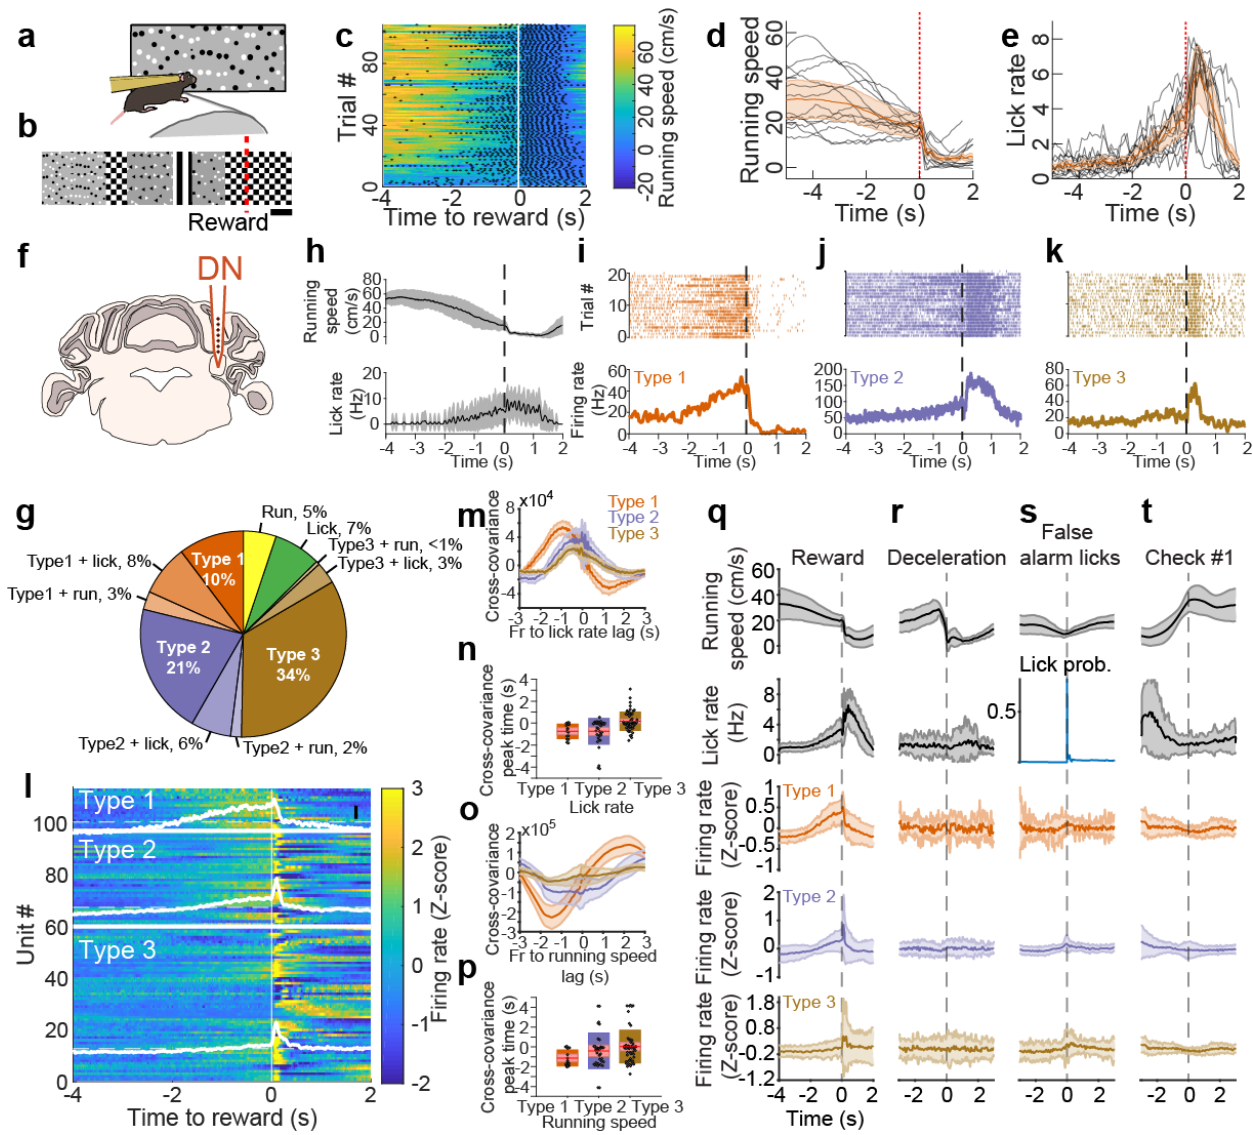

435  
 436 **Figure 1 | Preparatory signals in the dentate nucleus.** **a**, Schematic of the virtual reality setup. **B**,  
 437 Structure of visual textures lining the virtual corridor walls. The scale bar represents a distance of 40 cm.  
 438 Red dotted line defines the location of reward delivery. **c**, Summary of behavior for an example  
 439 recording session in a trained mouse. Running speed is color-coded. Black dots represent individual lick  
 440 times. Reward time is indicated by the vertical white line. **d**, Running speed profiles for all mice (black  
 441 curves, 13 expert mice) and population average (orange trace, shading is SEM). Red vertical dashed line  
 442 indicates reward. **e**, Same as **d** but for lick rate. **f**, Schematic showing recording location in the  
 443 cerebellar dentate nucleus (DN). **g**, Summary DN neuron classification. **h**, Running speed (top) and lick  
 444 rate (bottom) around reward time for an example recording. Black line is the average, grey shaded area  
 445 is the standard deviation. **i-k**, Spiking activity from example neurons in DN, classified as Type 1, Type 2  
 446 and Type 3. Top, spike raster for 20 consecutive trials. Bottom, average response profile centered on



447 reward delivery ( $t = 0$  s) from the same trials shown above. The vertical dotted line across **h-k** indicates  
448 reward time. **l**, Z-scored firing rate of Type 1, Type 2 and Type 3 DN neurons centered on reward time.  
449 White traces represent the average z-scored firing rate within each response type, the black scale bar in  
450 the top right corner represents 1 z-score unit. The white vertical line indicates reward time. **m**, Average  
451 cross-covariance between firing rates of all neurons (grouped by type) and lick rate for -2 to 2 s time lags  
452 (10 ms binning). The shaded areas represent SEM. **n**, Summary of firing rate to lick rate cross-covariance  
453 peak times for each neuron, grouped by type. Values of individual neurons are shown as black dots. In  
454 box plots, the red line represent the mean cross-covariance peak time value, the pink box represent the  
455 SEM and the box color-coded according to neuron type the SD. **o,p**, Cross-covariance between firing  
456 rates and running speed, description as in panels **m,n**. **q**, Average (line) and standard deviation (shaded  
457 area) of firing rate centered on reward delivery ( $t = 0$  s) for running speed, lick rate, firing rate (z-  
458 scored), averaged for all Type 1, Type 2, and Type 3 units. **r-t**, Same as in **q** for responses centered on  
459 deceleration events outside of the reward zone, first lick of a train (displayed as lick probability) outside  
460 of the reward zone and the appearance of the first non-rewarded checkerboard visual stimulus.  
461

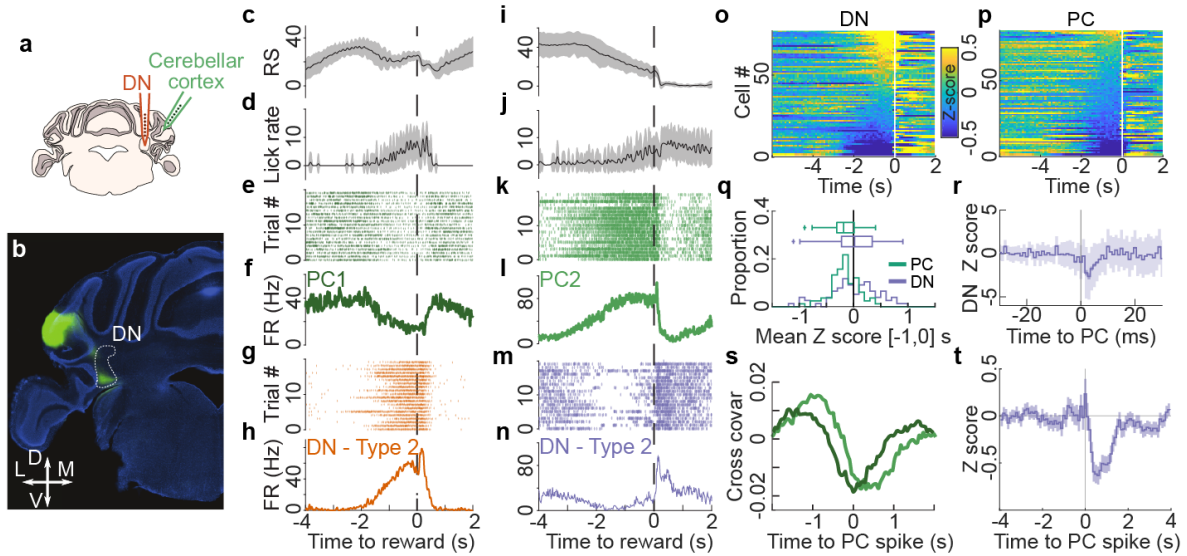

462

463

464 **Figure 2 | The relationship between activity of Lateral Crus1 Purkinje cells and dentate neurons. a,**

465 Schematic of experiments. The neurons in dentate nucleus (DN, orange) and putative Purkinje cells (PCs)

466 in the cerebellar cortex (green) were simultaneously recorded in mice performing the task. **b,** Injection

467 of AAV expressing GFP in the cerebellar cortex marking the axons of Purkinje cells (PC, green) projecting

468 to the part of the DN (white outline) that was targeted for recordings. Coronal slice, counterstained with

469 DAPI (blue). **c-n,** Examples of simultaneously recorded neurons including a type 1 DN cell (**c-h**) and a

470 type 2 DN cell (**i-n**). Running speed (RS, in Hz, **c,i**), lick rate (in Hz, **d,j**), spike raster plot for PC (**e,k**) and

471 DN neuron (**g,m**) and mean firing rate of the same neurons (**f,l,h,n**) aligned on reward. **o,p,** Average

472 response profiles for all DN neurons (**o**) and all PCs (**p**) sorted by their mean Z score value in the last

473 second before reward. White vertical line indicates reward time. **q,** Distribution (bottom) and bar plot

474 (top) of mean Z-score value in the last second before reward for PC (green) and DN neurons (purple). **r,**

475 Average Z-scored cross-correlogram for all modulated DN-PC pairs (56/2163 pairs, see Methods)

476 showing a short latency inhibition consistent with a monosynaptic inhibitory connection from PCs to DN

477 cells. Line is the mean, dark purple shading is SEM and light shading is std. **s,** Cross-covariance between

478 example PCs and DN cells from panel **c-h** (dark green) and panel **i-n** (light green) at different lags (5ms

479 bins). **t,** Average shuffle-corrected cross-correlogram (see Methods) for all the recorded pairs ( $n = 2163$

480 pairs, 3 mice) showing a decrease in the probability of DN cell firing in the second following PC activity.

481 Trace is mean +/- SEM.

482

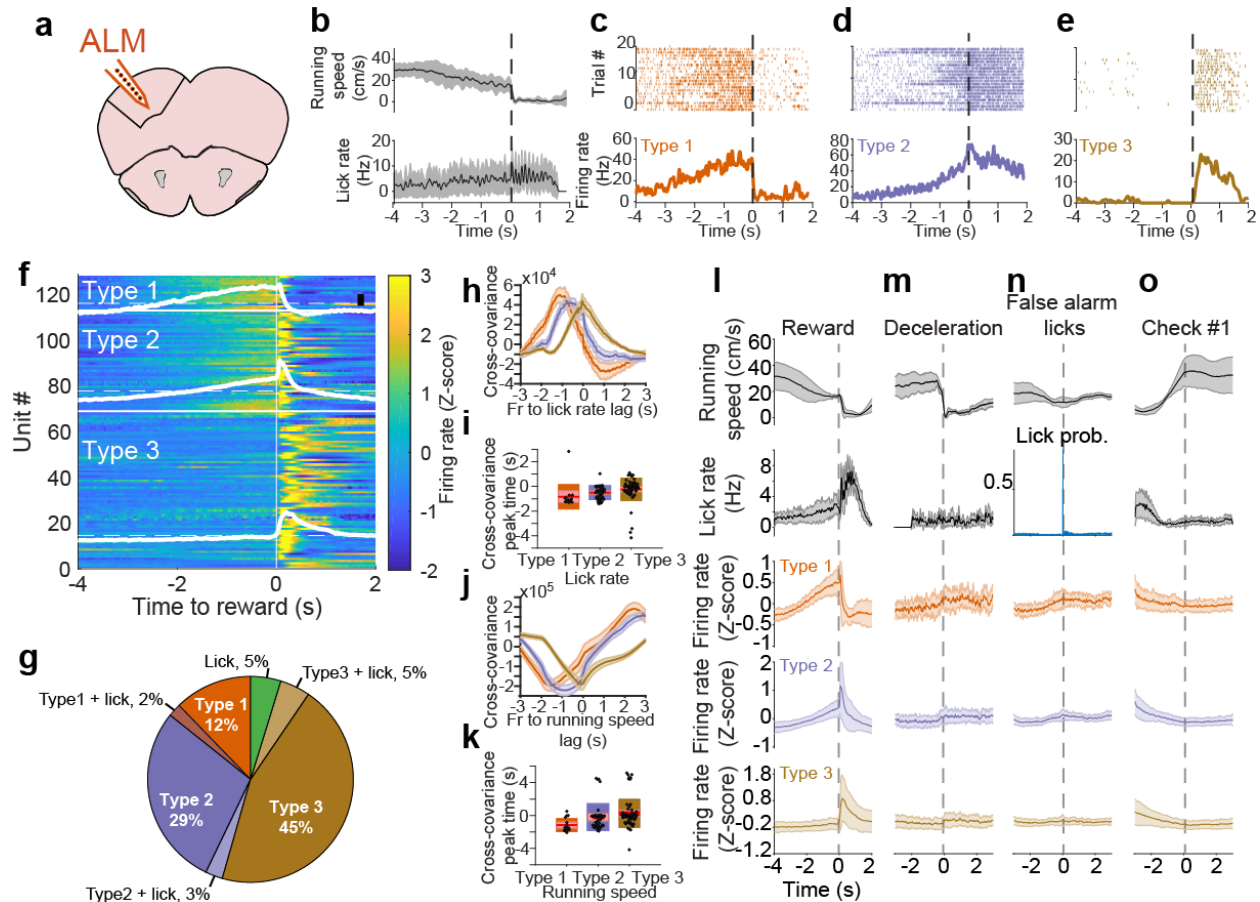

483

484 **Figure 3 | Preparatory activity in ALM.** **a**, Schematic showing recording location in ALM. **b**, Summary

485 ALM neuron classification. **c**, Running speed (top) and lick rate (bottom) around reward time for an

486 example recording. Black line is the average, grey shaded area is the standard deviation. **d-f**, Spiking

487 activity from example neurons in ALM, classified as Type 1, Type 2 and Type 3. Top, spike raster for 20

488 consecutive trials. Bottom, average response profile centered on reward delivery ( $t = 0$  s) from the same

489 trials shown above. The vertical dotted line across **c-f** indicates reward time. **g**, Activity of Type 1, Type 2

490 and Type 3 ALM neurons centered on reward time. White traces represent the average z-scored firing

491 rate within each response type, the black scale bar in the top right corner represents 1 z-score unit. The

492 white vertical line indicates reward time. **h**, Average cross-covariance between firing rates of all neurons

493 (grouped by type) and lick rate for -2 to 2 s time lags (10 ms binning). The shaded areas represent SEM. **i**,

494 Summary of firing rate to lick rate cross-covariance peak times for each neuron grouped by types. Values

495 of individual neurons are shown as black dots. In box plots, the red line represent the mean cross-

496 covariance peak time value, the pink box represent the SEM and the box color-coded according to

497 neuron type the SD. **j,k**, Cross-covariance between firing rates and running speed, description as in

498 panels **h,i**. **l**, Average (line) and standard deviation (shaded area) of firing rate centered on reward

499 delivery (  $t = 0$  s) for running speed, lick rate, firing rate (z-scored), averaged for all Type 1, Type 2, and  
500 Type 3 units. **m-o**, Same as in **l** for responses centered on deceleration events outside of the reward  
501 zone, first lick of a train (displayed as lick probability) outside of the reward zone and the appearance of  
502 the first non-rewarded checkerboard visual stimulus.  
503

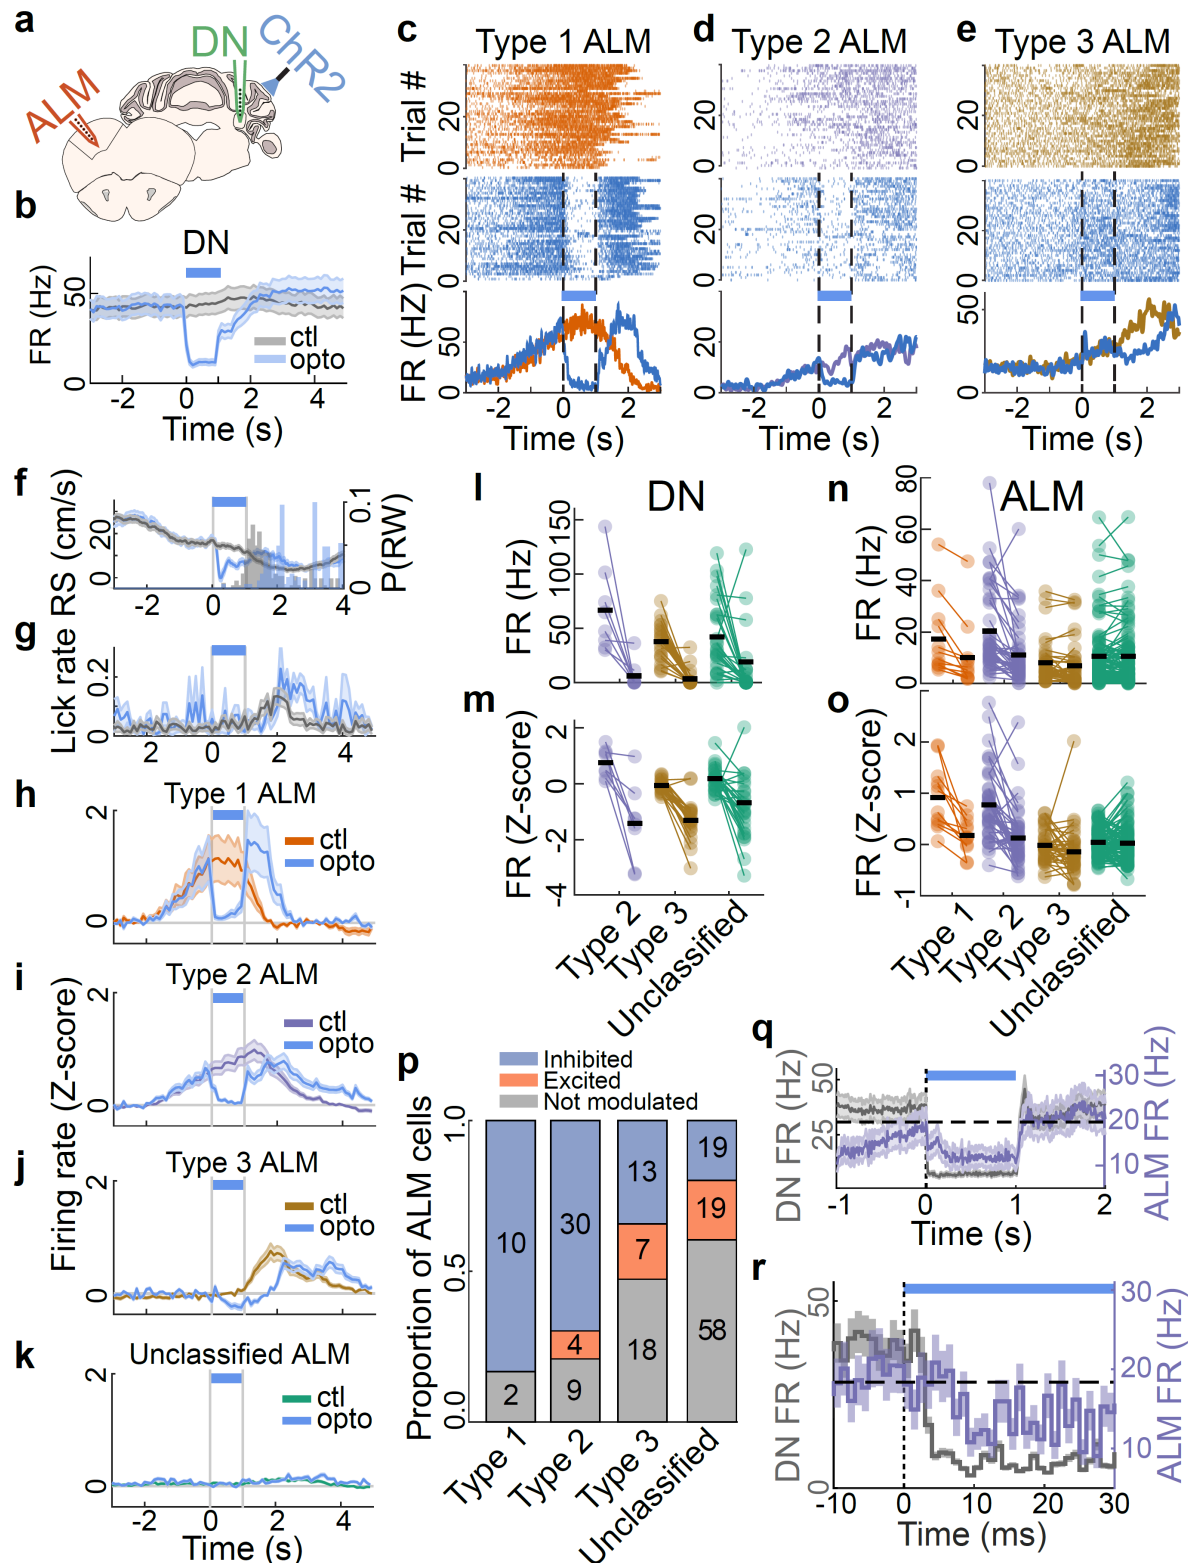

504

505 **Figure 4 | Cerebellar output is required for the persistence of ALM preparatory activity.** **a**, Schematic

506 of experiments. The DN (green) and ALM (orange) were simultaneously recorded in L7-ChR2 mice

507 performing the task during photoactivation of Purkinje cells (PC). **b**, PC photoactivation effectively

508 silenced DN population activity. **c-e**, Raster plot during control trials (top) and photoactivation trials  
509 (middle), and average responses (bottom) from example neurons recorded in ALM classified as Type 1  
510 (**c**), Type 2 (**d**) or Type 3 (**e**). **f-g**, Average profiles around time of stimulation in photoactivation trials  
511 (blue lines) and control trials (grey lines) for running speed (RS, **f**) and lick rate (**g**), and distribution of  
512 reward probability (P(RW)) in photoactivation trials (**f**, blue histogram) and control trials (**f**, grey  
513 histogram). **h-k**, Response profiles of ALM neurons aligned to photoactivation onset for Type 1 (**h**), Type  
514 2 (**i**), Type 3 (**j**) and unclassified cells (**k**) during photoactivation (blue traces) and control trials (coloured  
515 traces). **l-o**. Quantification of modulation. Average firing rate (**l,n**) and z-scored firing rate (**m,o**) during  
516 the first second after stimulation time for DN neurons (**l,m**) and ALM neurons (**n,o**). For all plots the first  
517 column of dots (one per cell) is the control condition, the second column the photoactivation condition.  
518 The black lines indicate the population mean. All types of DN cells were inhibited by photoactivation  
519 (**l,m**) while only Type 1 and 2 ALM cells showed a significant inhibition (**n,o**). **p**. Proportion of cells being  
520 inhibited (blue), excited (red) or not significantly modulated (grey) for the 4 classes of neurons (number  
521 of cells indicated in each bar). **q,r**. Average response profiles of firing rate around PC photostimulation  
522 onset for all DN neurons (grey) and all Type 1 and Type 2 ALM neurons (purple). Short-latency  
523 suppression persisted for 1 second, followed by a small rebound (**q**, 10ms bins, **r**, 1ms bins). In all plots,  
524 curves with shaded areas are mean  $\pm$  sem., Schematic of experiments. The DN (green) and ALM  
525 (orange) were simultaneously recorded in L7-ChR2 mice performing the task during photoactivation of  
526 Purkinje cells (PCs).  
527



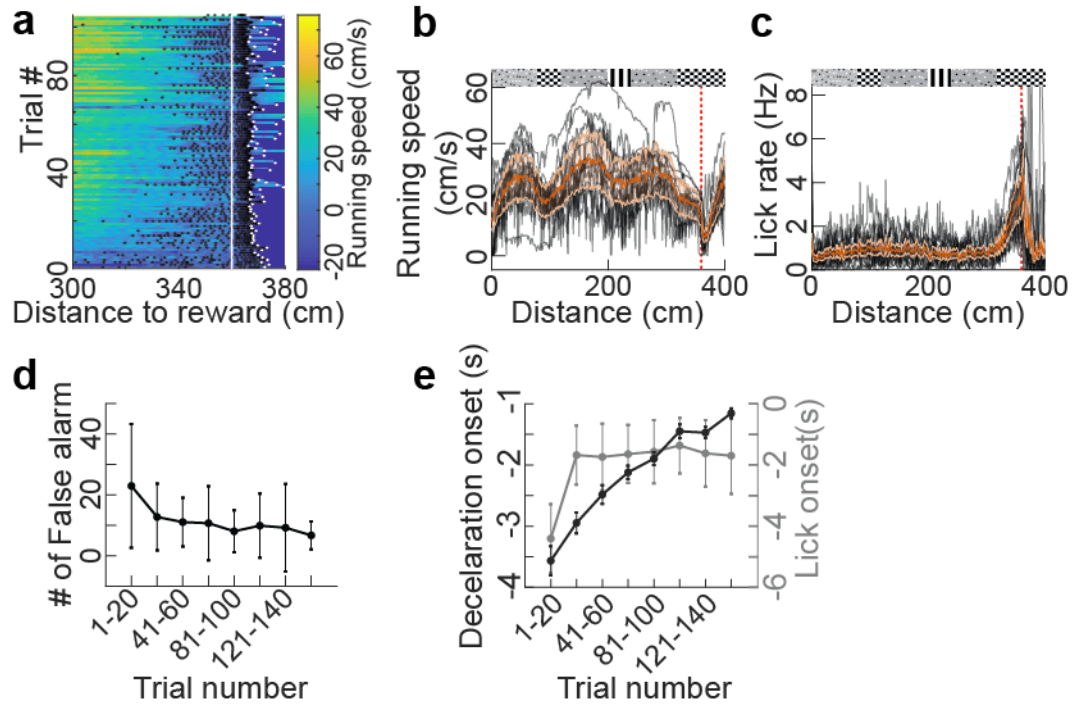

528

529 **Extended data figure 1 (attached to Fig. 1) | Refinement of motor behaviour in anticipation of reward.**

530 **a**, Summary of behavior for an example recording session of a trained mouse. Running speed over  
531 distance is color-coded. Black and white dots represent individual lick times and end of trial,  
532 respectively. Reward time is indicated by the vertical white line. **b**, Running speed profiles for all mice  
533 (black curves, 13 expert mice) and population average (orange trace, shading is SEM) aligned on  
534 distance to the reward. Red vertical dashed line indicates reward. **c**, Same as **b** but for lick rate. **d**,  
535 Number of false alarm licks averaged in chunks of 20 trials over the course of recording sessions across  
536 all mice. Error bars are standard deviations. **e**, Summary plots of deceleration and lick rate onsets  
537 relative to reward time (respectively, onset of 20% decrease and increase of Z-score values) averaged in  
538 chunks of 20 trials across recording sessions. Error bars are standard deviations.

539

540

541

542

543



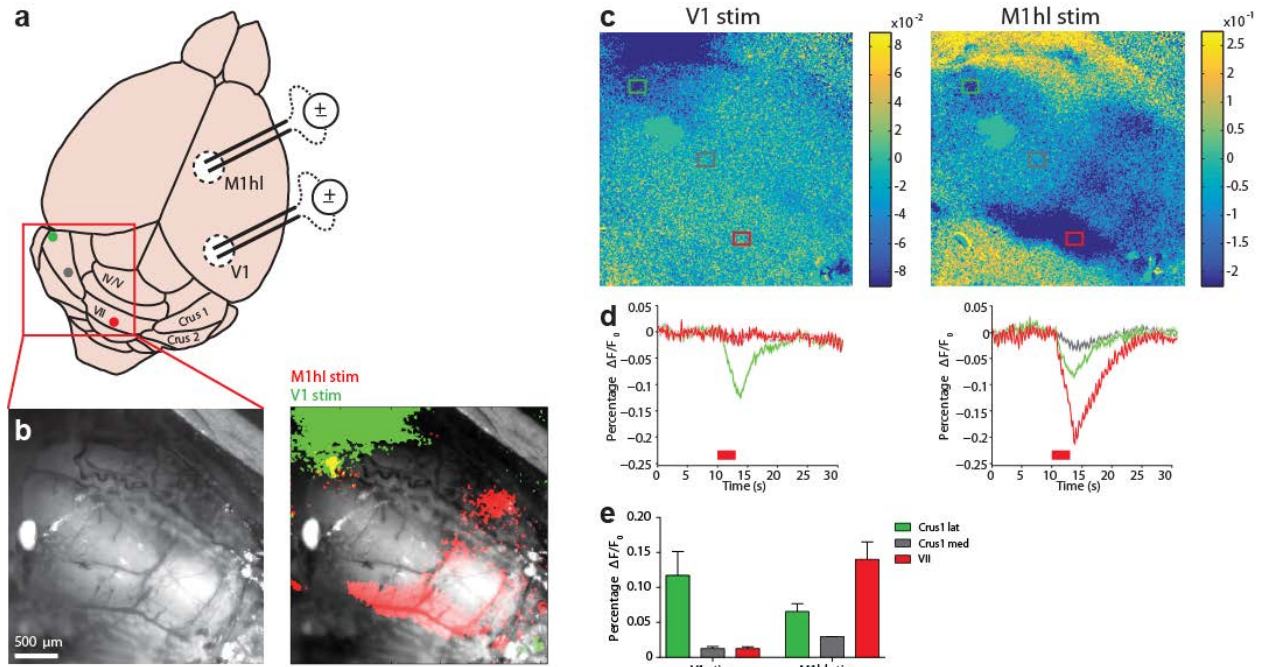

544

545 **Extended data figure 2 (attached to Fig. 2 and 3) | Mapping visuomotor cerebellum.** **a**, Schematic of  
 546 electrical stimulation for identification of a cerebellar region activated by inputs from primary visual  
 547 cortex (V1) and hind limb-related motor cortex (M1hl). Coloured dots correspond to regions from where  
 548 hemodynamic signals were measured in **c-e**: lateral crus1, medial crus 1 and lobule VII. **b**, Left: wide-  
 549 field image of the cerebellar surface. Right: same image overlaid with 20-trials average of hemodynamic  
 550 signals averaged across sessions (showing only peak decrease from baseline) for electrical stimulation of  
 551 V1 (green) and M1hl (red). **c**, Wide-field image of 20-trials average hemodynamic signals color-coded  
 552 according to percentage change of infrared (IR) reflectance from baseline for V1 (left) and M1hl  
 553 stimulation (right). Coloured rectangles indicate the areas from which the signals were measured from.  
 554 **d**, Mean response time courses after V1 (left) and M1hl stimulation (right) color-coded according to the  
 555 sampled areas in **c**.  $\Delta F/F_0$ , normalized change in reflectance. The timing of electrical stimulation is  
 556 indicated by the red bar below the traces. **e**, Summary of peak hemodynamic response values after V1  
 557 (left) and M1hl (right) stimulations for each cerebellar area.

558

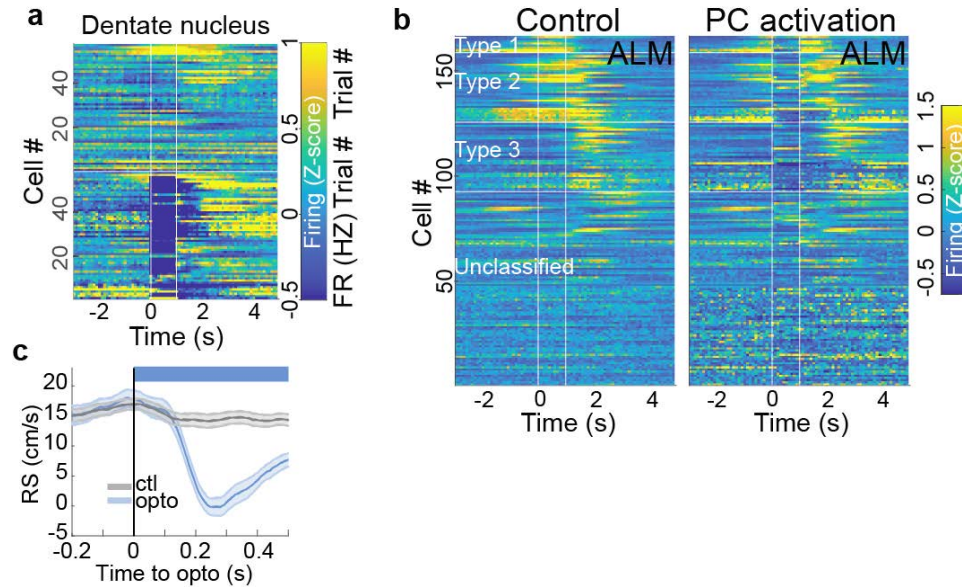

559

560 **Extended data figure 3 (attached to Fig 4) | Effects of cerebellar Purkinje cells photoactivation on DN**  
561 **and ALM neuronal populations and on mouse locomotion.** **a**, Purkinje cell (PC) photoactivation  
562 efficiently inhibited most DN neurons (one line per neuron). Upper half: control trials. Lower half:  
563 photoactivation trials. **b**, Purkinje cell photoactivation efficiently suppressed activity in most type 1 and  
564 type 2 ALM neurons (one line per neuron). Purkinje cell photoactivation (right) compared to control  
565 trials (left). The effects of photoactivation on Type 3 and unclassified ALM cells were more diverse. **c**,  
566 The effect on PC photoactivation ('opto') on running speed (RS).

567

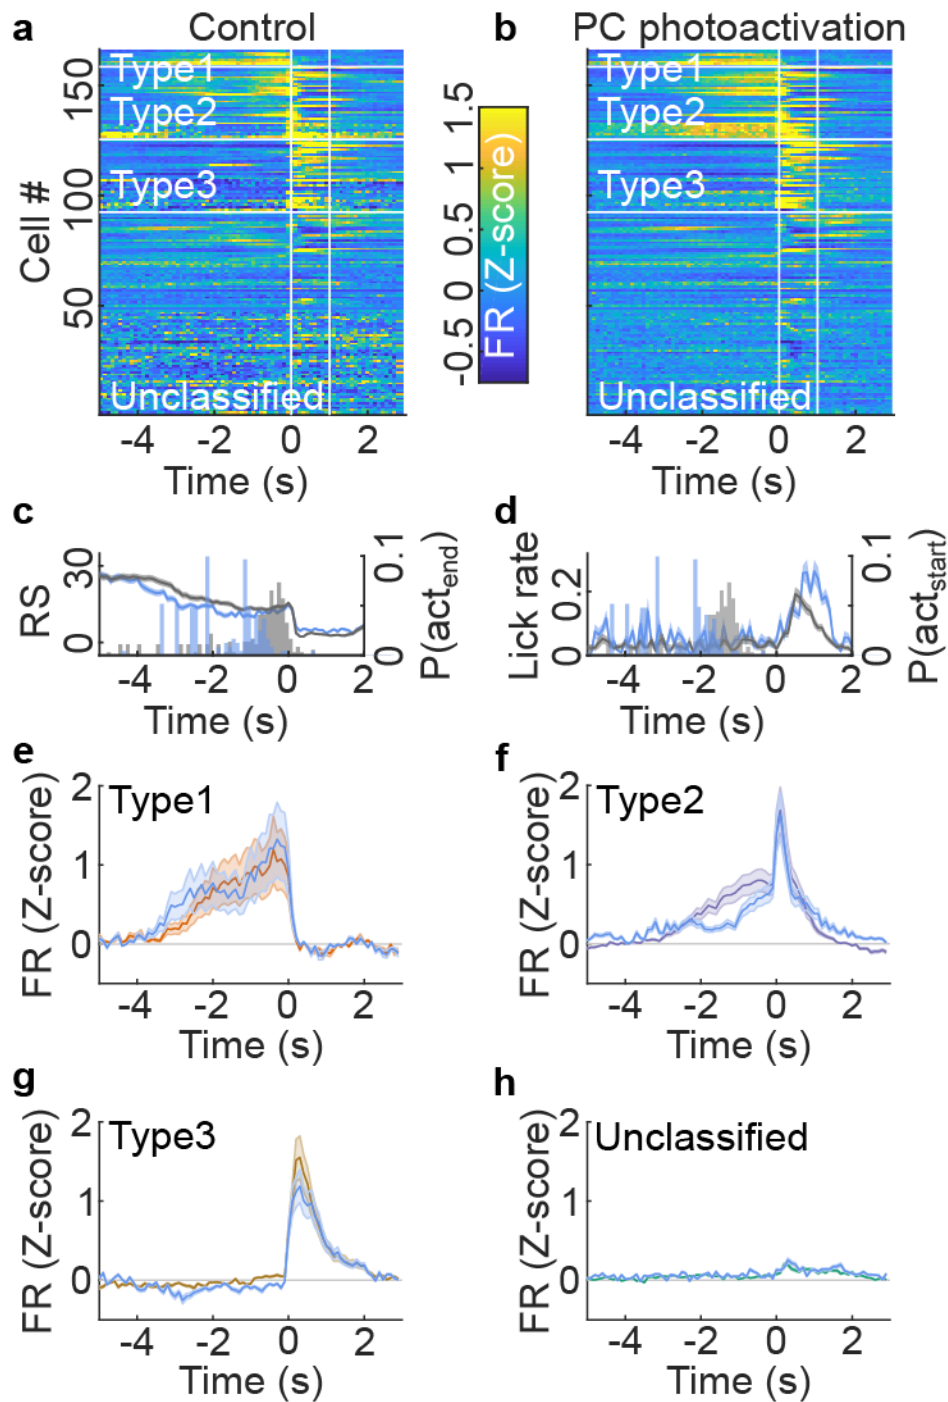

568

569 **Extended data figure 4 (attached to Fig 4) | Effects of cerebellar photoactivation on ALM activity**  
 570 **aligned to reward time. a,b**, Response profiles colour coded by firing rate z-score for all ALM neurons  
 571 sorted by cell type in control condition (**a**) and with photoactivation of Purkinje cells (PC, **b**) aligned on  
 572 time of reward delivery. **c,d**, Average profiles around time of stimulation in photoactivation trials (blue  
 573 lines) and control trials (grey lines) for running speed (RS, **c**) and lick rate (**d**). Histograms indicate the

574 start (**d**) and end (**c**) of the photoactivation period in control (gray) and test trials (blue). **e-h**, Firing rate  
575 profiles aligned to reward time for Type 1 (**e**), Type 2 (**f**), Type 3 (**g**) and unclassified ALM neurons (**h**)  
576 during photoactivation (blue traces) and control trials (coloured traces).
